# Supplementary material for: Multiple roles of the transcription factor AtMYBR1/AtMYB44 in ABA signaling, stress responses, and leaf senescence
Source: PubMed Central journal article supplement (PMC4219380; doi:10.1186/1471-2229-13-192), 2013-11-28
Supplement: 1471-2229-13-192-S1.pdf [file 1471-2229-13-192-S1.pdf]

## Supporting Data Online for

### Multiple Roles of the Transcription Factor AtMYBR1/AtMYBR44 in ABA Signaling, Stress Responses, and Leaf Senescence

Masrur R. Jaradat<sup>1</sup>, J. Allan Feurtado<sup>1</sup>, Daiqing Huang<sup>1</sup>, Yongquan Lu<sup>2</sup>, Adrian J. Cutler<sup>1\*</sup>

<sup>1</sup>Plant Biotechnology Institute, National Research Council of Canada, 110 Gymnasium Place, Saskatoon S7N 0W9, Canada, and

<sup>2</sup>Zhejiang Agriculture and Forestry University, Hangzhou, China 311300.

\*For correspondence (fax +1 306 975 4839; e-mail: Adrian.cutler@nrc.ca).

This PDF file includes:

**Additional file 1: Figures S1 to S4 and Tables S2, S3 and S5**

**Methods**

Other Supporting Online Materials for this manuscript includes the following:

**Additional file 2: Table S1.** Significant Gene List Obtained from T-Test P-Value Cut-Off  $\leq 0.05$  and Fold Change  $\geq 1.5$  (Excel File).

**Additional file 3: Table S4.** MYBR1 Represses Genes Induced by Natural Leaf Senescence (Excel File).

Supporting Online Materials

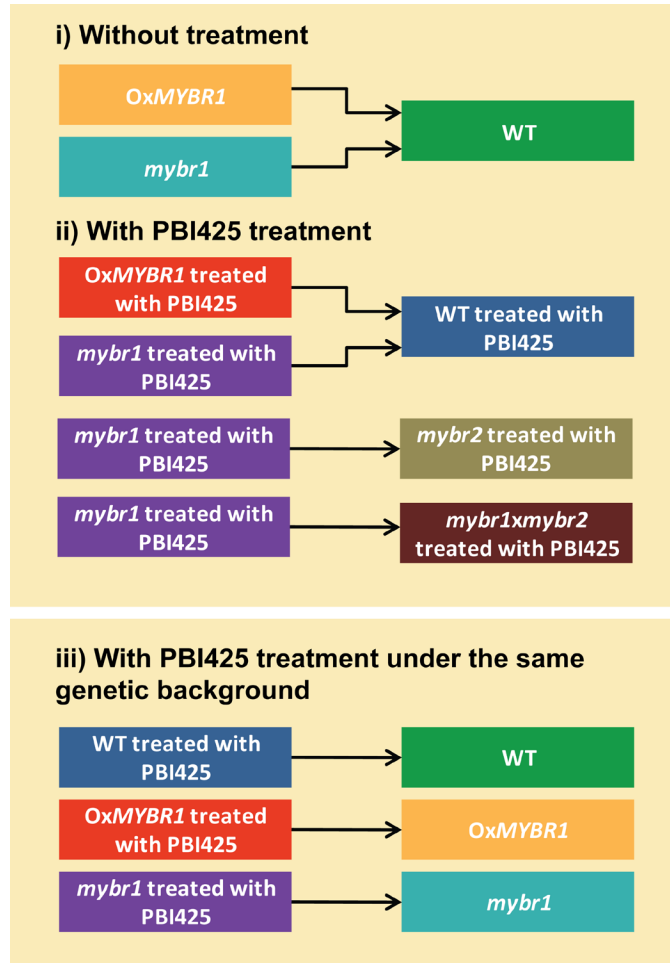

**Additional file 1: Figure S1** Experimental Designs of Two Color Arabidopsis Microarray Experiments Using Above-Ground Tissues of 5 Weeks Old Plants.

**i) Genotype comparisons of untreated plants:** effects of *MYBR1* on gene expression changes were studied by comparing gene expression of gain-of function *OxMYBR1* versus wildtype (WT) (Col-0) and loss-of-function *mybr1* versus WT.

**ii) Genotype comparisons after PBI425 treatments on each genotype:** (+)-8' acetylene ABA (PBI425) is a hyperactive ABA analog which intensifies and/or prolongs expression of ABA responsive genes and hence is an effective tool to identify weakly and transiently expressed ABA responsive genes (Huang et al., 2007). Therefore, 5 weeks old plants were treated with PBI425 for 24 hours and the effects of *MYBR1* on gene expression were studied in comparisons of *OxMYBR1* (treated with PBI425) versus WT (treated with PBI425) and *mybr1* (treated with PBI425) versus either WT, *mybr1* or *mybr1xmybr2* (treated with PBI425).

**iii) Effect of PBI425 treatments on each genotype:** Effects of *MYBR1* on gene expression were studied by treating each genotype (WT, *OxMYBR1* and *mybr1*) with PBI425 and comparing their gene expressions with untreated of the same genetic background.

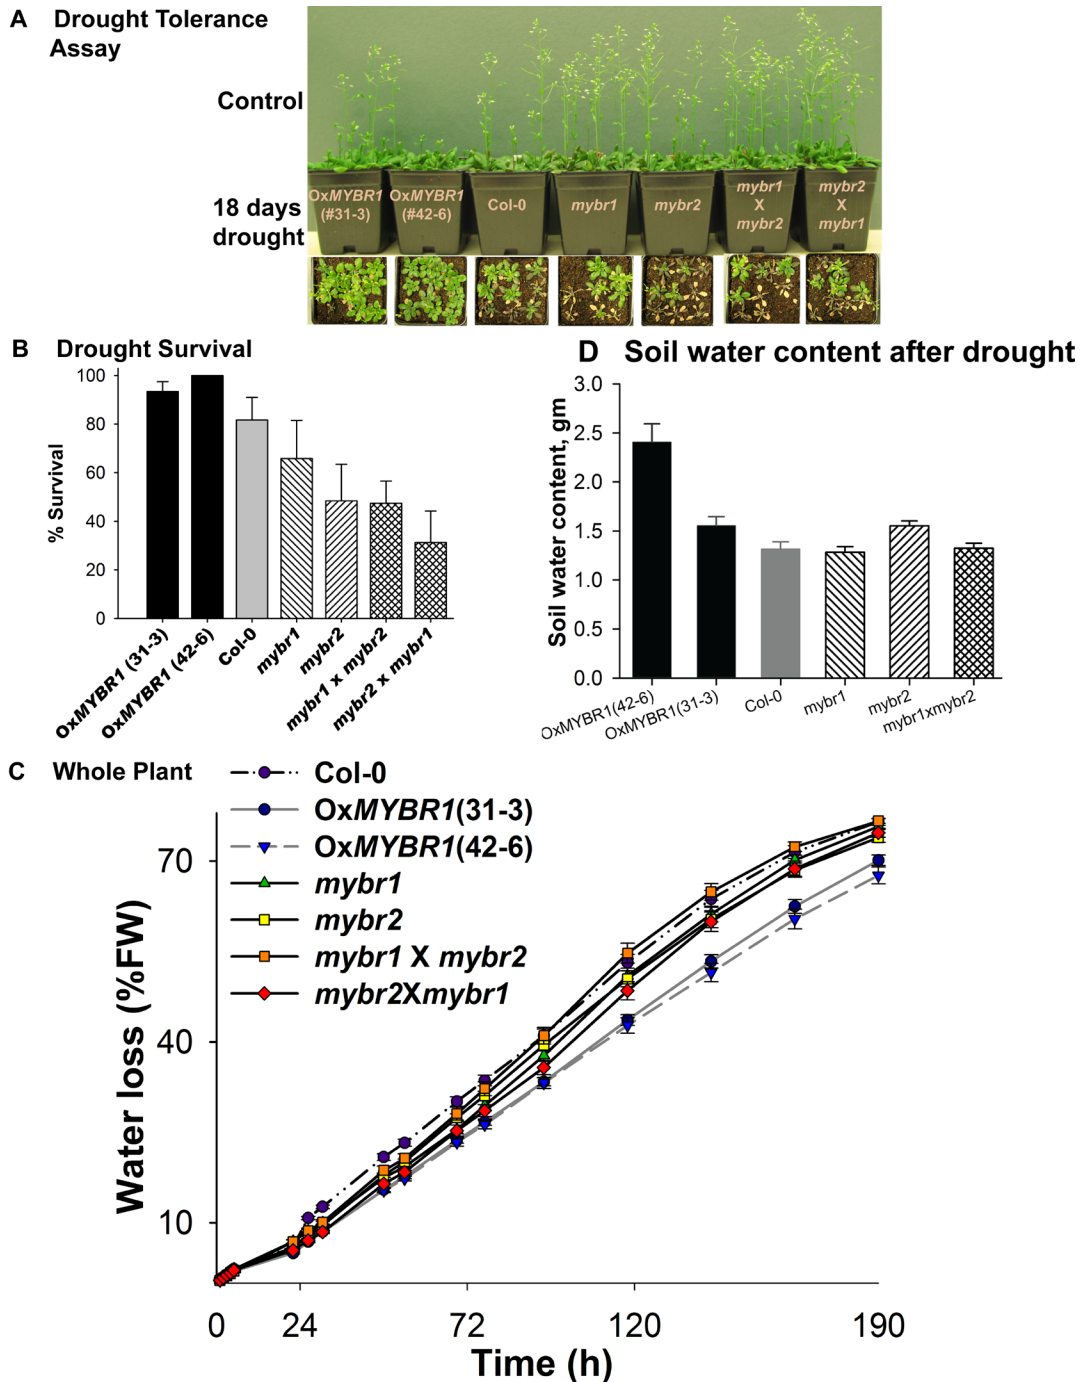

**Additional file 1: Figure S2** Reduced Water Uptake by Gain of *AtMYBR1* Function Leads to Apparent Drought Tolerance. **(A)** Plants from two 35S::*MYBR1* lines -- 31-3 and 42-6 were used. One-week old seedlings were subjected to drought stress for 18 days by withholding water and ten pots of plants for each genotype were subjected to the stress. Pictures were taken 2 days after rewatering. Control plants were watered regularly as needed. **(B)** Increased survival of drought stress by gain-of-function *AtMYBR1* lines -- 31-3 and 42-6. Survival rate and standard error (bar; n=10) were calculated 2 days after rewatering. The P-value between groups of single factor ANOVA is 6.84E-05. **(C)** Transpirational water loss from 24 d old whole plants. Plants were grown normally for 24 d then pots were sealed at the soil surface (plastic wrap) to eliminate evaporation. The pots were weighed at intervals for 190 h. Water loss and standard error were calculated at each time point (bar; n=10). The P-value of two factor ANOVA is 4.2E-98. **(D)** Soil water content after 8 days of drought; standard error (bar; n=12).

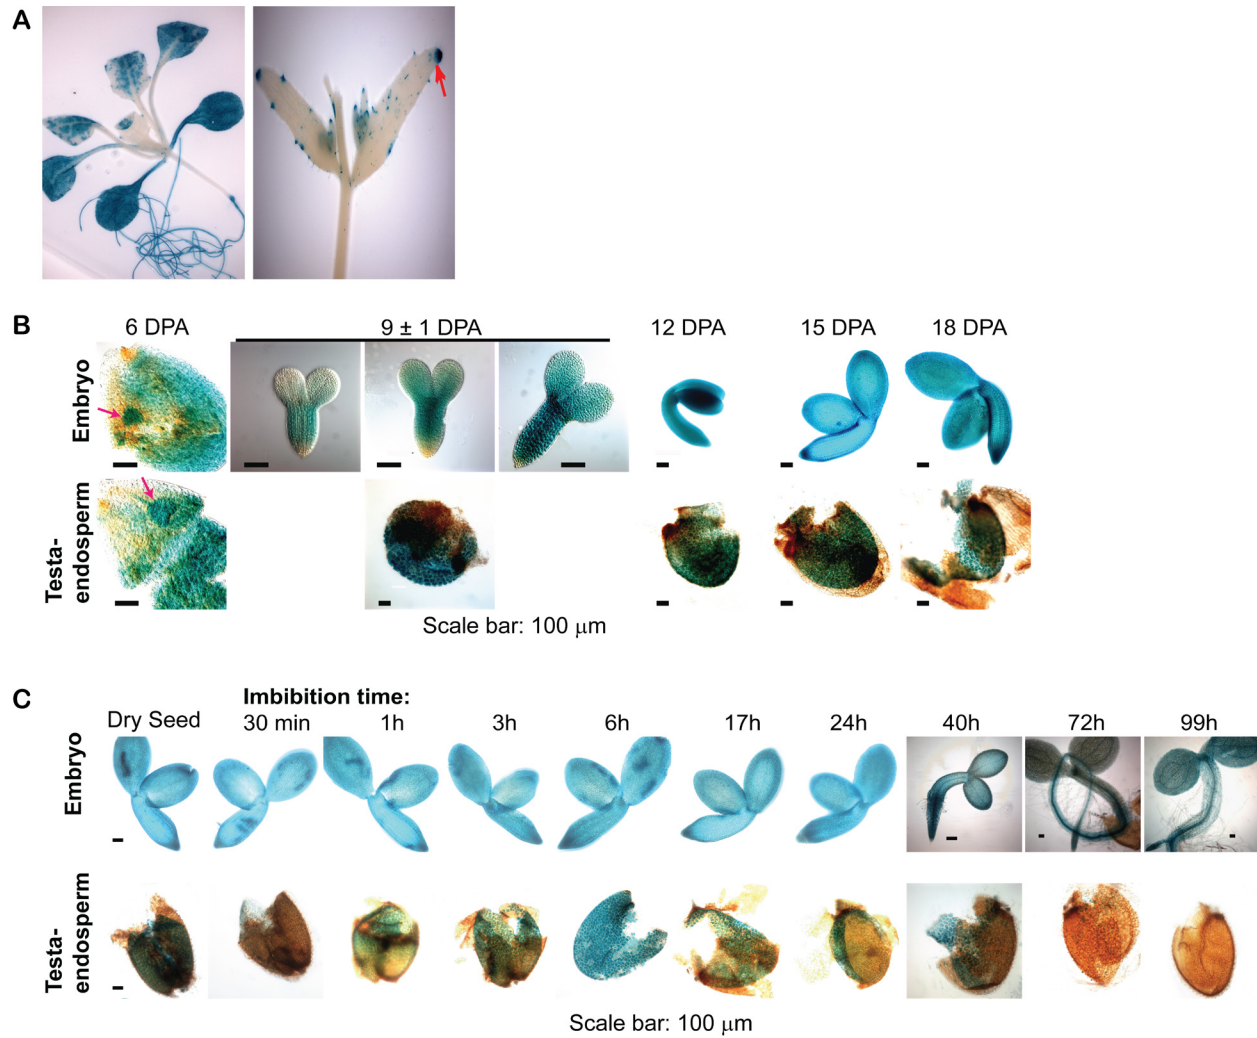

**Additional file 1: Figure S3** Expression of *MYBR1pro:GUS* in Vegetative Tissues, Embryos and Endosperm at Different Developmental Stages and after Imbibition of Mature Seeds. Histochemical localization of GUS activity was performed by staining with X-gluc for different time intervals as described below and in Methods.

(A) Mature rosette leaves of a 13d old seedling showed more *GUS* expression than juvenile rosette leaves. Very little to no *GUS* expression in cauline leaves except in hydathodes (shown by an arrow) which show intense *GUS* expression.

(B) Developmental expression of *MYBR1pro:GUS* in embryos and endosperm collected from siliques at 6-18 DPA. Arrowheads indicate embryos at 6 DPA.

(C) Time course of *MYBR1pro:GUS* expression in embryo, endosperm and seedling after imbibition of mature seeds.

**Additional file 1: Figure S4** Physical Interaction of MYBR1 and MYBR2 with PYL8, MYBR2 and INO in the Presence of 10  $\mu$ M of Various Hormones and Inhibitors of Auxin Signaling (2(P-chlorophenoxy)2-methyl propanoic acid; PCIB) and Auxin Transport (2,3,5-triiodobenzoic acid; TIBA and N-(1-naphthyl phthalamidic acid/naptalam; NPA).

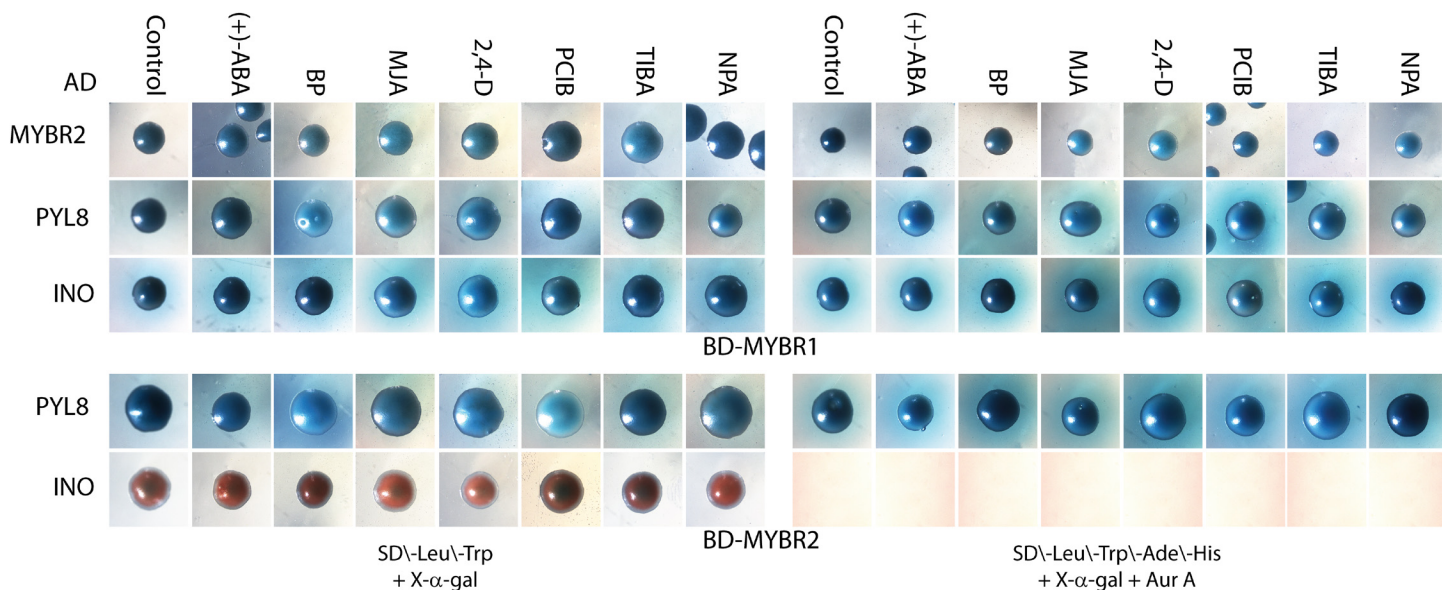

**Additional file 1: Table S2** Enriched TF sites (<http://www.bioinformatics2.wsu.edu/cgi-bin/Athena/cgi/home.pl> and <http://arabidopsis.med.ohio-state.edu/AtcisDB/>)

| <b>P-value</b>                                   | <b>Name of TF binding site motif</b> | <b>Responsive to stimuli</b>      | <b>#P</b> | <b>#S</b> |
|--------------------------------------------------|--------------------------------------|-----------------------------------|-----------|-----------|
| <b>Repression of ABA response:</b>               |                                      |                                   |           |           |
| < 10 - 10                                        | ABRE-like binding site motif         | ABA; dehydration; low temperature | 106       | 186       |
| < 10 - 10                                        | ACGTABREMOTIFA2OSEM                  | ABA                               | 82        | 121       |
| < 10 - 10                                        | CACGTGMOTIF                          | ABA; light; UV-light;             | 72        | 190       |
| < 10 - 10                                        | GADOWNAT                             | GA                                | 51        | 70        |
| < 10 - 6                                         | Z-box promoter motif                 | Light                             | 19        | 20        |
| < 10 - 7                                         | ABRE binding site motif              | ABA                               | 30        | 31        |
| < 10 - 4                                         | ABREATRD22                           | ABA; dehydration                  | 16        | 16        |
| < 10 - 4                                         | GBOXLERBCS                           | Light                             | 16        | 17        |
| < 10 - 4                                         | ABFs binding site motif              | ABA                               | 19        | 20        |
| <b>Constitutive repression of ABA responses:</b> |                                      |                                   |           |           |
| < 10 - 9                                         | DREB1A/CBF3                          | Drought; salt; freezing           | 15        | 23        |
| < 10 - 8                                         | ABRE-like binding site motif         | Dehydration; low temperature      | 23        | 42        |
| < 10 - 6                                         | DRE core motif                       | Drought; high salinity; cold      | 21        | 35        |
| < 10 - 5                                         | ACGTABREMOTIFA2OSEM                  | ABA                               | 17        | 25        |
| < 10 - 5                                         | CACGTGMOTIF                          | Light                             | 17        | 44        |
| < 10 - 5                                         | GADOWNAT                             | GA                                | 13        | 15        |
| < 10 - 4                                         | EveningElement promoter moti         | Circadian clock                   | 10        | 12        |
| < 10 - 4                                         | Z-box promoter motif                 | Light                             | 7         | 7         |
| <b>ABA-like repression:</b>                      |                                      |                                   |           |           |
| < 10 - 5                                         | UPRMOTIFIAT                          | Stress                            | 29        | 30        |
| <b>MYBR1 independent ABA repression:</b>         |                                      |                                   |           |           |
| < 10 - 4                                         | lbox promoter motif                  | Light                             | 157       | 206       |
| <b>MYBR1 independent ABA activation:</b>         |                                      |                                   |           |           |
| < 10 - 10                                        | ABFs binding site motif              | ABA                               | 28        | 31        |
| < 10 - 10                                        | ABRE binding site motif              | ABA                               | 35        | 40        |
| < 10 - 10                                        | ACGTABREMOTIFA2OSEM                  | ABA                               | 93        | 148       |
| < 10 - 10                                        | CACGTGMOTIF                          | Light                             | 70        | 182       |
| < 10 - 9                                         | ABRE-like binding site motif         | Dehydration; low temperature      | 111       | 201       |
| < 10 - 9                                         | GADOWNAT                             | GA                                | 59        | 81        |
| < 10 - 7                                         | GBOXLERBCS                           | Light                             | 22        | 24        |
| < 10 - 5                                         | GBF1/2/3 BS in ADH1                  | Light                             | 14        | 28        |
| < 10 - 4                                         | ABREATRD22                           | ABA                               | 16        | 16        |
| < 10 - 4                                         | TGA1 binding site motif              | Light                             | 19        | 22        |
| < 10 - 4                                         | UPRMOTIFIAT                          | Stress                            | 19        | 22        |
| < 10 - 4                                         | Z-box promoter motif                 | Light                             | 17        | 18        |

#P: number of promoters with TF sites; #S: number of predicted TF sites

**Additional file 1: Table S3** Primers for QRT-PCR and Gene Cloning for Yeast Two-Hybrid and BiFC Analysis.

| Gene                                                                 | AGI       | Primers (5' → 3')                                                                                                    |
|----------------------------------------------------------------------|-----------|----------------------------------------------------------------------------------------------------------------------|
| <b>QRT-PCR</b>                                                       |           |                                                                                                                      |
| <i>ACTIN2</i>                                                        | At3g18780 | F: aacccaaaggccaacagaga<br>R: aaggtcacgtccagcaaggt                                                                   |
| <i>MYBR1</i>                                                         | At5g67300 | F: tctccacctgtgtactgggctt<br>R: ttgactcgtggctacggttgact                                                              |
| <i>SAG12</i>                                                         | At5g45890 | F: gctgatttaaccaatgacga<br>R: tttcttctccagtcaacag                                                                    |
| <i>SAG21</i>                                                         | At4g02380 | F: gaacttccaatgctatcttcc<br>R: ggttgattcttccactcct                                                                   |
| <i>SAG29</i>                                                         | At5g13170 | F: tcacgctttcttcttctc<br>R: ggactcatcacgacaatactc                                                                    |
| <i>SEN1</i>                                                          | At4g35770 | F: ctggatcatcggtatttctc<br>R: catttctctgcttgtgtc                                                                     |
| <i>SEN4</i>                                                          | At4g30270 | F: ctctccttagacaaatcctctg<br>R: cactcatattaccaagaactc                                                                |
| <i>ABI5</i>                                                          | At2g36270 | F: cgggtgtcttcagatggatta<br>R: attccactgtatatgcttgtt                                                                 |
| <i>EEL</i>                                                           | At2g41070 | F: gagacagtagtccctcaaga<br>R: ctctaattcatgtgtataagcctg                                                               |
| <i>ABF1</i>                                                          | At1g49720 | F: gggtttattgagactagcg<br>R: atcttgattcactagcttgagac                                                                 |
| <i>ABF2</i>                                                          | At1g45249 | F: attgtcatcagaaggatagg<br>R: ctgcttctgtgtaactcgt                                                                    |
| <i>ABF3</i>                                                          | At4g34000 | F: ctgatctgactccaaagagc<br>R: ttccagttccatcgtataagc                                                                  |
| <i>ABF4</i>                                                          | At3g19290 | F: caggctagagaaggttatcg<br>R: ttccagttccaatgtataagcc                                                                 |
| <b>Gateway cloning of ORFs into pGADT7 vector - Yeast two-hybrid</b> |           |                                                                                                                      |
| <i>PYR1</i>                                                          | At4g17870 | F: ggggacaagttgtacaaaaagcaggcttaatgccttcggagttaca<br>R: ggggaccactttgtacaagaaagctgggtacgtcacctgagaaccact             |
| <i>PYL1</i>                                                          | At5g46790 | F: ggggacaagttgtacaaaaagcaggctgcatggcgaattcagagtcctc<br>R: ggggaccactttgtacaagaaagctgggtacctaacctgagaagagttgtgt      |
| <i>PYL2</i>                                                          | At2g26040 | F: ggggacaagttgtacaaaaagcaggcttaatgagctcatccccggcc<br>R: ggggaccactttgtacaagaaagctgggtattattcatcatgcatagag           |
| <i>PYL3</i>                                                          | At1g73000 | F: ggggacaagttgtacaaaaagcaggcttaatgaatctgtccaatccatg<br>R: ggggaccactttgtacaagaaagctgggtatcaggctcgagaagccgtgga       |
| <i>PYL5</i>                                                          | At5g05440 | F: ggggacaagttgtacaaaaagcaggcttaatgaggtcaccgggtgcaa<br>R: ggggaccactttgtacaagaaagctgggtattgcccggttggtactctc          |
| <i>PYL6</i>                                                          | At2g40330 | F: ggggacaagttgtacaaaaagcaggctgcatgccaacgtcgatacagt<br>R: ggggaccactttgtacaagaaagctgggtacgagaatttagaagttctctc        |
| <i>PYL7</i>                                                          | At4g01026 | F: ggggacaagttgtacaaaaagcaggctgcatggagatgatcggaggaga<br>R: ggggaccactttgtacaagaaagctgggtaaaggttggttctgtatgattct      |
| <i>PYL8</i>                                                          | At5g53160 | F: ggggacaagttgtacaaaaagcaggcttaatggaagctaaccgggattgaga<br>R: ggggaccactttgtacaagaaagctgggtattagactctcgattctgtcgt    |
| <i>PYL9</i>                                                          | At1g01360 | F: ggggacaagttgtacaaaaagcaggcttaatgatggacggcgttgaa<br>R: ggggaccactttgtacaagaaagctgggtactgagtaatgtcctgaga            |
| <i>PYL10</i>                                                         | At4g27920 | F: ggggacaagttgtacaaaaagcaggctgcatgaacgggtgacgaacaaaga<br>R: ggggaccactttgtacaagaaagctgggtatatcttcttccatagattctgctgt |

*PYL11* At5g45860 F: ggggacaagttgtacaaaaaagcaggcttaatggaaacttctcaaaaatc  
R: ggggaccactttgtacaagaaagctgggtattacaactttagatgagccac  
*PYL12* At5g45870 F: ggggacaagttgtacaaaaaagcaggcttaatgaaaacatctcaagaacag  
R: ggggaccactttgtacaagaaagctgggtattaagtgagctccatcatctt  
*PYL13* At4g18620 F: ggggacaagttgtacaaaaaagcaggcttaatggaaagtctaagcaaaaacgatg  
R: ggggaccactttgtacaagaaagctgggtattacttcatcattttcttgt

**In-Fusion cloning of ORFs into pGBT9 vector - Yeast two-hybrid**

*MYBR1* At5g67300 F: tgtatcgccggaattcatggctgataggatcaaaggcca  
R: gcaggtcgacggatccctactcgattctccaactccaatttg  
*MYBR2* At3g50060 F: tgtatcgccggaattcatggcgatcggttaaagg  
R: gcaggtcgacggatccctactcaaccttaggtgttattactcc

**Gateway cloning of ORFs into pDONR221 vector - BiFC**

*MYBR1* At5g67300 F: ggggacaagttgtacaaaaaagcaggcttaatggctgataggatcaaa  
R: ggggaccactttgtacaagaaagctgggtactcgattctccaactccaattt  
*MYBR2* At3g50060 F: ggggacaagttgtacaaaaaagcaggcttaatggcgatcggttaaa  
R: ggggaccactttgtacaagaaagctgggtactcaaccttaggtgttat  
*PYL8* At5g53160 F: ggggacaagttgtacaaaaaagcaggcttaatggaagctaacgggattga  
R: ggggaccactttgtacaagaaagctgggttagactctcgattctgctgctct

F, forward; R, reverse

**Additional file 1: Table S5** *MYBR1* represses genes associated with leaf senescence. Microarray data of present study and van der Graaff et al. [21] were compared and gene regulation of common genes between the two studies is listed. NS: developmental senescence; DIS: darkening-induced senescence; DET: senescence in dark-induced detached leaf; Gene regulation symbols ↑: upregulation; ↓: downregulation; —: either ‘not differentially expressed’ or ‘undetectable’. Number of genes in bold font constitutes 70% or more of the common genes and asterisk represents 90% or more.

| Class    | Classification of gene regulation type                | N°<br>common<br>gene | Gene regulation (N° gene) |         |                              |                 |                  |
|----------|-------------------------------------------------------|----------------------|---------------------------|---------|------------------------------|-----------------|------------------|
|          |                                                       |                      | <i>Present study</i>      |         | <i>van der Graaff et al.</i> |                 |                  |
|          |                                                       |                      | ABA                       | MYBR1   | NS                           | DIS             | DET              |
| <b>A</b> | Repression of ABA response                            | 165                  | ↑ (165)                   | ↓ (165) | ↑(145)<br>↓(19)              | ↑(123)<br>↓(34) | ↑(101)<br>↓(55)  |
| <b>B</b> | ABA-like repression                                   | 161                  | ↓ (161)                   | ↓ (161) | ↑(16)<br>↓(144)              | ↑(9)<br>↓(150)* | ↑(10)<br>↓(150)* |
| <b>C</b> | MYBR1 independent ABA repression                      | 261                  | ↓ (261)                   | —       | ↑(13)<br>↓(248)*             | ↑(8)<br>↓(251)* | ↑(11)<br>↓(249)* |
| <b>D</b> | ABA independent repression                            | 59                   | —                         | ↓ (59)  | ↑(13)<br>↓(45)               | ↑(11)<br>↓(48)  | ↑(12)<br>↓(45)   |
| <b>E</b> | Constitutive activation of ABA-repressed 10 responses | 10                   | ↓ (10)                    | ↑ (10)  | ↑(1)<br>↓(9)*                | ↓(10)*          | ↓(9)*            |
| <b>F</b> | ABA-like activation                                   | 38                   | ↑ (38)                    | ↑ (38)  | ↑(27)<br>↓(11)               | ↑(18)<br>↓(17)  | ↑(18)<br>↓(19)   |
| <b>G</b> | MYBR1 independent ABA activation                      | 146                  | ↑ (146)                   | —       | ↑(126)<br>↓(19)              | ↑(116)<br>↓(26) | ↑(98)<br>↓(45)   |
| <b>H</b> | ABA independent activation                            | 11                   | —                         | ↑ (11)  | ↑(7)<br>↓(4)                 | ↑(1)<br>↓(9)    | ↑(1)<br>↓(9)     |



## **Additional Methods**

### **Drought Tolerance Assay**

Drought tolerance assay was performed as follows: 3.5 inch square pots were filled with wet soil (Sunshine 3 Mix from Sun Gro Horticulture Inc.) in ten replicates for each genotype. Seeds of each genotype were sprinkled on soil, and pots were equilibrated with water for three days during stratification at 4 °C. Pots were transferred to a growth chamber at 22°C and 40% humidity with 16 h of 165  $\mu$ E light and 8 h dark cycles and covered with transparent cover for 2 days. Four days after transfer to growth chamber, excess seedlings were discarded leaving 8-11 well-spaced seedlings per pots. On day 7 of transfer, drought stress was imposed by withholding water for 18 days. Data was collected and pictures were taken 2 days after re-watering. Controls were watered regularly at 3 days interval.

### **Transpirational Water Loss Assay of Whole Plants**

Seeds were sewn densely as described to create a bush of foliage covering the soil. On day 24, watering was stopped and pots were sealed with several layers of cling wrap to minimize water loss other than from plants. Pots were weighed at intervals up to 190 h. A fan was placed in the growth chamber to circulate air uniformly.

### **Soil Water Content Measurement after Drought**

Following stratification at 4 °C plants were grown in soil for 15 d in a growth chamber of 22°C and 64% humidity with 16 h of 150  $\mu$ E light and 8 h dark cycles then transplanted individually into 2"x 2.5" pots filled with 90 ml sand: soil (2:1) mix and each pot was watered with 30 ml Hoagland solution. Plants were watered again after 12 d as above. After 8 d, aerial parts of plants were discarded and soil weight was measured. Then soil was dried for 18 h at 110 °C and soil weight was measured again. Water content was calculated from the difference of soil dry and wet weight.
